# Supplementary material for: Development of a machine learning-based multimode diagnosis system for lung cancer
Source: publisher site journal article supplement (doi:10.18632/aging.103249), 2020-05-23
Supplement: Supplementary file [file aging-v12i10-103249-supplementary-material-SD1.pdf]

## SUPPLEMENTARY TABLES

**Supplementary Table 1. Demographic characteristics of subjects in the third-layer subsystem.**

| Variables                     | Lung benign (n=64) | Lung cancer (n=59) | $\chi^2/Z$ | <i>P</i> |
|-------------------------------|--------------------|--------------------|------------|----------|
| Age Grouping                  |                    |                    |            |          |
| ≤45                           | 12                 | 1                  | 9.447      | 0.002*   |
| >45                           | 52                 | 58                 |            |          |
| Age (year)                    | 57(47-68)          | 59(53-68)          | -1.371     | 0.170    |
| Gender                        |                    |                    |            |          |
| Female                        | 33                 | 42                 | 4.968      | 0.026*   |
| Male                          | 31                 | 17                 |            |          |
| Smoking Status                |                    |                    |            |          |
| No                            | 48                 | 33                 | 4.964      | 0.026*   |
| Yes                           | 16                 | 26                 |            |          |
| Drinking Status               |                    |                    |            |          |
| No                            | 56                 | 51                 | 0.030      | 0.861    |
| Yes                           | 8                  | 8                  |            |          |
| History of Lung Infection     |                    |                    |            |          |
| No                            | 44                 | 34                 | 1.637      | 0.201    |
| Yes                           | 20                 | 25                 |            |          |
| Chest Tightness or Chest Pain |                    |                    |            |          |
| No                            | 24                 | 22                 | 0.001      | 0.981    |
| Yes                           | 40                 | 37                 |            |          |
| Expectoration                 |                    |                    |            |          |
| No                            | 31                 | 14                 | 8.078      | 0.004*   |
| Yes                           | 33                 | 45                 |            |          |
| Bloody Sputum                 |                    |                    |            |          |
| No                            | 55                 | 38                 | 7.717      | 0.005*   |
| Yes                           | 9                  | 21                 |            |          |
| Cough                         |                    |                    |            |          |
| No                            | 21                 | 8                  | 6.316      | 0.012*   |
| Yes                           | 43                 | 51                 |            |          |
| Hemoptysis                    |                    |                    |            |          |
| No                            | 57                 | 51                 | 0.197      | 0.657    |
| Yes                           | 7                  | 8                  |            |          |
| Fever or Sweating             |                    |                    |            |          |
| No                            | 35                 | 43                 | 4.380      | 0.036*   |
| Yes                           | 29                 | 16                 |            |          |
| Family History of Tumor       |                    |                    |            |          |
| No                            | 62                 | 50                 | 5.546      | 0.019*   |
| Yes                           | 2                  | 9                  |            |          |
| Family History of Lung Cancer |                    |                    |            |          |
| No                            | 64                 | 50                 | 10.533     | 0.001*   |
| Yes                           | 0                  | 9                  |            |          |

\*: Statistically significant at *P*=0.05 level.

**Supplementary Table 2. Comparison of AUCs among ANN, SVM and C5.0 models.**

| <b>Comparison between models</b> | <b>Z</b> | <b>P</b> |
|----------------------------------|----------|----------|
| C5.0-1 vs ANN-1                  | 1.981    | 0.048*   |
| C5.0-1 vs SVM-1                  | 2.114    | 0.035*   |
| ANN-1 vs SVM-1                   | 3.283    | 0.001*   |
| C5.0-2 vs ANN-2                  | 2.021    | 0.043*   |
| C5.0-2 vs SVM-2                  | 0.915    | 0.360    |
| ANN-2 vs SVM-2                   | 1.669    | 0.095    |
| C5.0-3 vs ANN-3                  | 0.035    | 0.972    |
| C5.0-3 vs SVM-3                  | 1.131    | 0.258    |
| ANN-3 vs SVM-3                   | 1.096    | 0.273    |

\*: Statistically significant at  $P=0.05$  level.
